# Supplementary material
Source: MDPI journal article supplement (https://www.mdpi.com/2624-862X/5/1/17)
Supplement: s1 [file s1]

Archive with 1 entries (1 files):
- dairy-2846436-supplementary.pdf
